# Supplementary material
Source: PubMed Central journal article supplement (PMC1326240)
Supplement: nar_34_1_78__1.pdf [file nar_34_1_78__1.pdf]

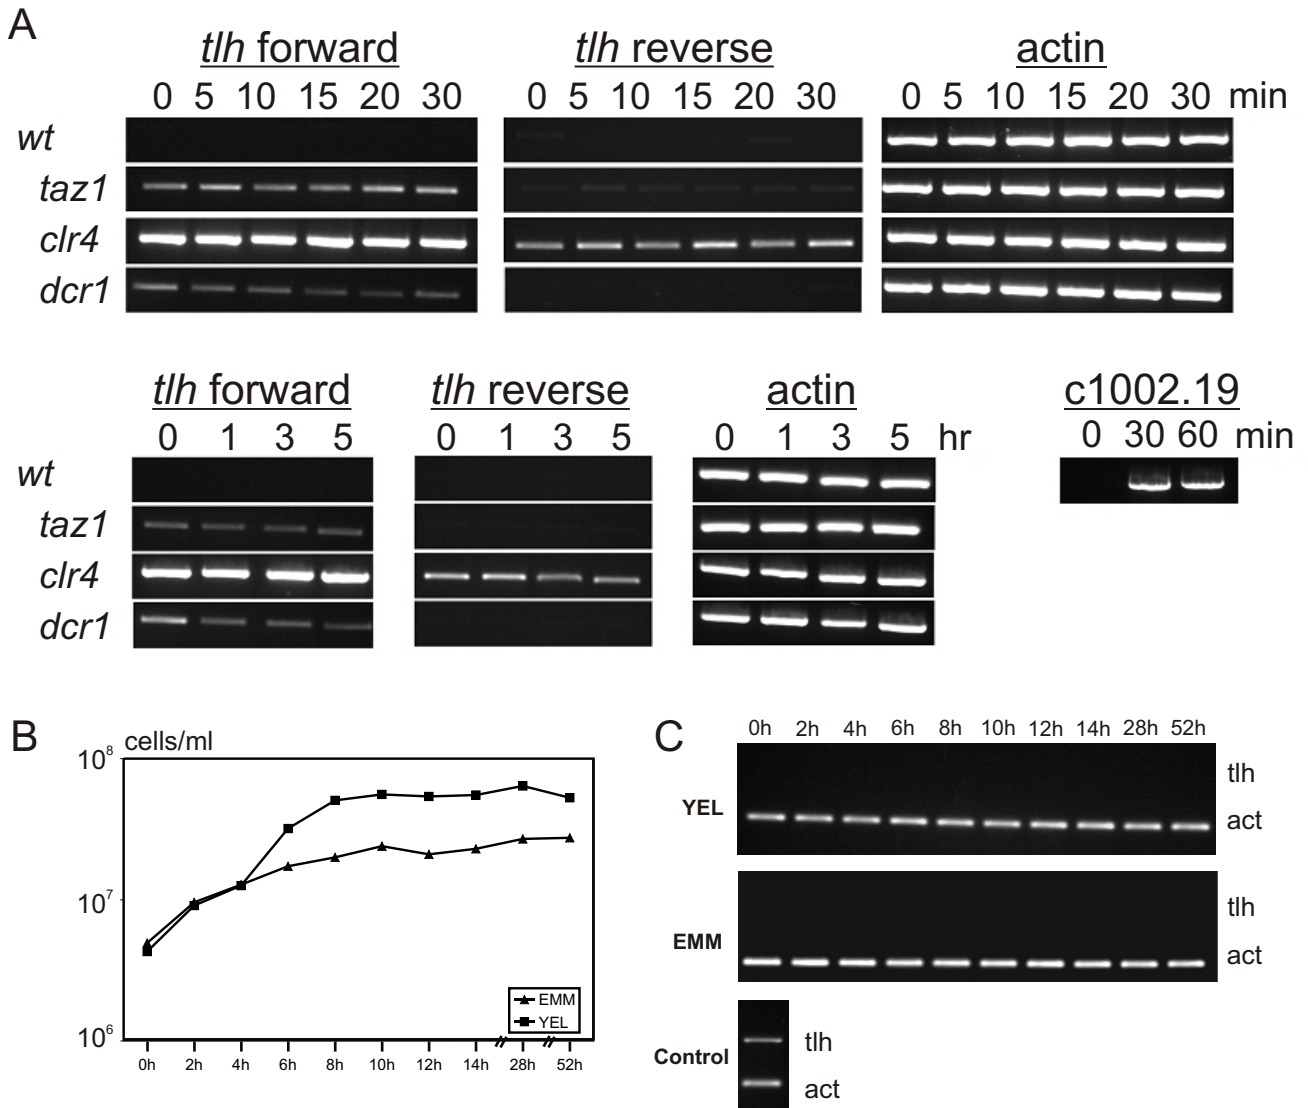

**Figure 1.** Influence of stresses on *tlh* expression. **(A)** Transcription of the *tlh* genes was monitored by RT-PCR during the course of a nitrogen starvation experiment using the OKR40 and OKR41 primers as described in Materials and Methods. Transcription of SPAC1002.19, a gene induced by nitrogen starvation (52), was monitored in the same RNA preparations using OKR23 (GCTTTAGCTGTTGCCGGTGG) and OKR24 (GTAGTTCTCGGCAGAGTCACCAG). wt:SPK10; *taz1*:J11; *clr4*:SPK20; *dcr1*:TV293 **(B)** Growth curves of cells used in (C). **(C)** Transcription of the *tlh* genes was monitored in wild-type cells (SPK10) entering stationary phase in minimal (EMM) or rich medium (YES). Transcription of the *tlh* genes was monitored at the same time in *clr4* cells (SPK20) as a control for the RT-PCR (Control).
